# Supplementary material for: A 3D porous hetero-metal compound with helical channels
Source: Royal Society of Chemistry journal article supplement (doi:10.1039/b904910j), 2009-01-01
Supplement: b904910j.pdf [file b904910j.pdf]

**Electronic Supporting Information**

**3D Porous Hetero-metal Compound with Helical Channels**

Hai-Yang Liu, Zhen-Jie Zhang, Wei Shi, Bin Zhao, Peng Cheng\*, Dai-Zheng Liao,  
Shi-Ping Yan

Department of Chemistry, Nankai University, 94 Weijing Road, Tianjin, 300071, P. R.  
China.

Fax: (+86)22-23502458; Tel: (+86)22-23505207

E-mail: [pcheng@nankai.edu.cn](mailto:pcheng@nankai.edu.cn)

## General Methods

Analyses for C, H and N were carried out on a Perkin-Elmer analyzer. Inductively Coupled Plasma Analyses were carried out on ICAP-9000. Thermal gravimetric analysis data were collected on NETZSCH TG analyzer. Diffraction intensity data for single crystals of **1** was collected at room temperature on a Bruker Smart CCD diffractometer equipped with graphite monochromated MoK $\alpha$  radiation ( $\lambda = 0.71073 \text{ \AA}$ ). The structures were solved by the direct method and refined by the full-matrix least-squares method on  $F^2$  with anisotropic thermal parameters for all non-hydrogen atoms.<sup>[1,2]</sup>

### References

- (1) Sheldrick, G. M. *SHELXS 97, Program for the Solution of Crystal Structures*; University of Göttingen: Germany, **1997**.
- (2) Sheldrick, G. M. *SHELXL 97, Program for the Refinement of Crystal Structures*; University of Göttingen: Germany, **1997**.

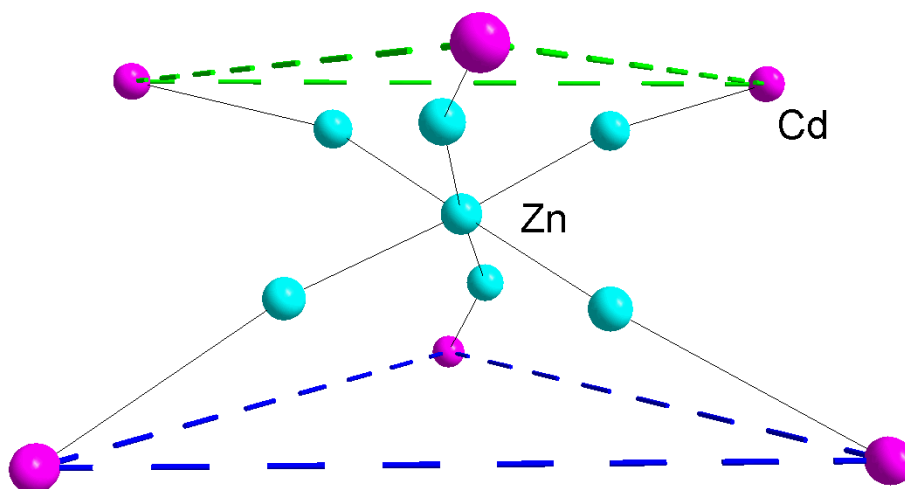

**Figure S1.** The representation diagrams of tridecanuclear unit  $[\text{Zn}_7\text{Cd}_6]$ .

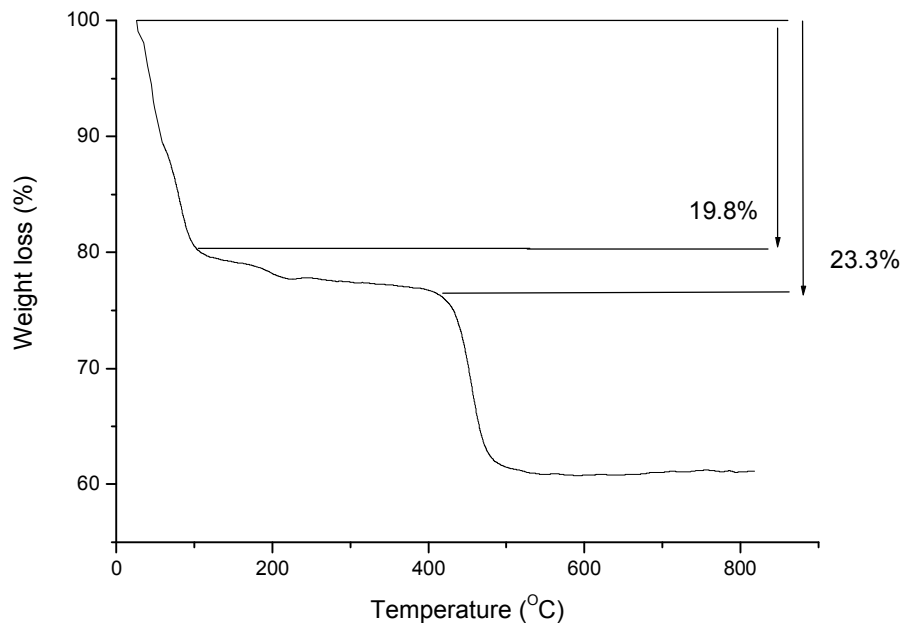

**Figure S2.** The TGA curve of **1** (the weight loss of 19.8 % corresponds to the loss of 28 lattice water molecules and the weight loss of 23.3 % corresponds to the loss of 28 lattice water molecules and 6 coordinated water molecules).
